# Supplementary material for: Cardiac forces regulate zebrafish heart valve delamination by modulating Nfat signaling
Source: PLoS Biol. 2022 Jan 14;20(1):e3001505. doi: 10.1371/journal.pbio.3001505 (PMC8794269; doi:10.1371/journal.pbio.3001505)
Supplement: S1 Data — (XLSX) [file pbio.3001505.s031.xlsx]

## Sheet: Fig 1G
	Fig 1G						Fig 1H
	Developmental stage (hpf)	Split (n)	Not Split (n)	Total (n)			Embryo	65 hpf	72 hpf not split	72 hpf split	98 hpf
	65	0	25	25			1	10	10	3	7
	72	16	29	45			2	8	17	4	8
	76	22	6	28			3	12	10	4	9
	80	67	5	72			4	14	15	3	5
	98	22	0	22			5	10	14	3	11
							6	13	11	3	5
	Developmental stage (hpf)	Split (%)	Not Split (%)				7	8	10	3	8
	65	0	100				8	15	7	3	5
	72	35.5556	64.4444				9	10	10	3	5
	76	78.5714	21.4286				10	11	9		7
	80	93.0556	6.94444				11	12			6
	98	100	0				12	10			11
							13	12			8
							14	10			13
							15	11			12
							16	12			12
							17	8
							18	17
							19	10
							20	9
							average	11.1	11.3	3.22222	8.25
							count	20	10	9	16

## Sheet: Fig S4B' Cdh5 mean
	55 hpf		luminal	abluminal adjacent
			mean intensity	mean intensity				Ratio abAdj/lum
		E1	34.9786	15.9153				0.455002
		E2	50.2287	25.1982				0.501669
		E3	27.7255	13.7646				0.496459
		E4	23.8116	17.2136				0.72291
		E5	38.0567	32.7633				0.860907
		E6	61.5296	61.7814				1.00409
		E7	42.7286	49.0747				1.14852
		E8	44.5252	47.7131				1.0716
		E9	84.308	103.436				1.22688
		E10	59.9283	47.2978				0.78924
		E11	38.5201	30.917				0.802619
		E12	46.61	44.2448				0.949256		Single value t test Ratio abAdj/lum (population mean 1)				Rank sum test
		E13	35.6972	27.014				0.756754		55 hpf	The t-value is -3.125468. The value of p is .006522. The result is significant at p < .01.	0.006522		0.0113224
		E14	44.215	35.7974				0.809621		65 hpf	The t-value is -4.936641. The value of p is .00059. The result is significant at p < .01.	0.00059		0.00488281
		E15	47.6127	45.2481				0.950338		80 hpf	The t-value is 0.674533. The value of p is .509602. The result is not significant at p < .01.	0.509602		0.619154
		E16	40.3515	35.4365				0.878195
		E17	48.1387	36.6402				0.761139
	MEAN		45.2333	39.3798			Mean Ratio	0.834424
	65 hpf		luminal	abluminal adjacent
			mean intensity	mean intensity				Ratio abAdj/lum
		E1	26.3958	28.643				1.08513
		E2	13.9646	6.585				0.47155
		E3	20.2529	20.9955				1.03667
		E4	52.8517	28.0172				0.530109
		E5	82.533	37.1629				0.450279
		E6	69.0721	42.5736				0.616364
		E7	79.3697	52.0686				0.656026
		E8	56.8426	38.987				0.685876
		E9	20.5636	15.5114				0.754313
		E10	30.759	16.151				0.525082
		E11	46.1212	15.339				0.33258
	MEAN		45.3387	27.4576			Mean Ratio	0.649453
	80hpf		luminal	abluminal adjacent
			mean intensity	mean intensity				Ratio abAdj/lum
		E1	36.0533	42.5468				1.18011
		E2	42.5468	49.1336				1.15481
		E3	19.8687	23.7412				1.19491
		E4	25.4436	26.1322				1.02706
		E5	40.962	33.0141				0.80597
		E6	77.3526	86.1906				1.11426
		E7	42.0085	55.5746				1.32294
		E8	28.5652	29.5632				1.03494
		E9	83.7726	64.3834				0.76855
		E10	53.355	64.223				1.20369
		E11	33.8709	31.0194				0.915814
		E12	46.1528	37.8415				0.819918
		E13	68.3848	49.7991				0.728219
		E14	40.5593	37.8566				0.933365
		E15	44.4556	33.0125				0.742595
		E16	44.4556	52.7957				1.18761
		E17	31.7748	46.8748				1.47522
	MEAN		44.6813	44.9237			Mean Ratio	1.03588

## Sheet: Fig S4B'' Cdh5 max
	55 hpf		luminal		abluminal adjacent
			max intensity		max intensity				Ratio abAdj/lum
		E1	51.5419		30.7387				0.596383
		E2	74.9023		46.7733				0.624458
		E3	46.05		22.4343				0.487172
		E4	41.8061		32.412				0.775293
		E5	64.2424		53.29				0.829515
		E6	95.7397		93.136				0.972804
		E7	61.84		67.9728				1.09917
		E8	61.6667		67.5224				1.09496
		E9	138.08		157.127				1.13794
		E10	103.871		68.5696				0.660142
		E11	56.8675		49.0371				0.862305
		E12	67.0444		67.1818				1.00205		Two-tailed single value t test Ratio abAdj/lum (population mean 1)				Rank sum test
		E13	63.9039		44.8534				0.701889		55 hpf	The t-value is -3.516824. The value of p is .00286. The result is significant at p < .05.	0.00286		0.0075
		E14	59.1333		54.1806				0.916245		65 hpf	The t-value is -3.594987. The value of p is .004888. The result is significant at p < .05.	0.004888		0.0098
		E15	70.7683		66.1175				0.934281		80 hpf	The t-value is 1.722869. The value of p is .10418. The result is not significant at p < .05.	0.10418		0.1773
		E16	65.2004		48.03				0.736652
		E17	66.1833		53.896				0.814344
	MEAN		69.9318		60.1925			Mean Ratio	0.837977
								COUNT	17
	65 hpf		luminal		abluminal adjacent
			max intensity		max intensity				Ratio abAdj/lum
		E1	38.808		48.7787				1.25692
		E2	22.8571		12.552				0.54915
		E3	29.4443		33.54				1.1391
		E4	81.9222		43.302				0.528575
		E5	120.387		59.2114				0.491844
		E6	117.01		65.5777				0.560445
		E7	126.593		85.258				0.673481
		E8	80.123		65.1334				0.812918
		E9	29.8914		23.26				0.778151
		E10	47.8975		26.188				0.546751
		E11	64.0487		26.594				0.415216
	MEAN		68.9984		44.4905			Mean Ratio	0.704778
								COUNT	11
	80hpf		luminal		abluminal adjacent
			max intensity		max intensity				Ratio abAdj/lum
		E1	57.0205		62.8442				1.10213
		E2	62.8442		72.496				1.15358
		E3	22.0538		27.2882				1.23734
		E4	35.111		56.6496				1.61344
		E5	94.614		64.8706				0.685635
		E6	106.258		136.894				1.28831
		E7	60.7012		99.1042				1.63266
		E8	49.372		50.13				1.01535
		E9	136.883		102.42				0.748231
		E10	79.6533		98.5				1.23661
		E11	58.0084		51.218				0.882941
		E12	63.1616		55.36				0.876482
		E13	94.696		75.811				0.800572
		E14	59.5884		55.046				0.92377
		E15	83.5768		78.4133				0.938219
		E16	83.5768		126.288				1.51104
		E17	51.6782		79.8408				1.54496
	MEAN		70.5175		76.069			Mean Ratio	1.1289
								COUNT	17

## Sheet: Fig S7
Fig S7H				Fig S7K					Fig S7O					Fig S7P					Fig S7Q
48-50hpf no process				48-50hpf process					60 hpf					65 hpf					80 hpf
	Ratio				Ratio					Ratio					Ratio					Ratio
	AVC	Atrium			AVC	AVC subset	Atrium			Abluminal cells	Cells overlaying AVC	Atrium			Abluminal cells	Cells overlaying AVC	Atrium			Inner layer of leafet/ AVC wall	Outer layer of leaflet	Atrium
E1	1.74721	1.64418		E1	1.75082	1.2554	1.26169		E1	1.0325	1.83401	1.54066		E1	1.0958	2.33852	4.58668		E1	1.5531	2.47431	2.89675
E2	1.50248	1.31642		E2	1.18984	0.92285	1.17962		E2	0.91708	1.29006	1.28792		E2	1.18705	2.02366	2.19629		E2	2.70001	1.80618	2.10559
E3	1.65795	1.35787		E3	1.1904	0.60425	1.50045		E3	0.77998	1.70262	1.84471		E3	0.95926	1.26359	2.59737		E3	3.22812	1.93089	2.21312
E4	2.08158	1.68018		E4	0.97425	0.50556	0.96627		E4	1.05523	2.69447	4.80016		E4	1.56817	2.21975	3.77498		E4	1.60077	2.02304	2.11332
E5	1.70427	1.73829		E5	1.06241	0.88499	1.22071		E5	1.04764	2.17852	1.34931		E5	1.1488	1.9065	2.05472		E5	3.43499	3.75991	2.06484
E6	1.71665	1.02206		E6	1.54498	0.98191	1.07718		E6	1.14547	1.25659	1.47358		E6	1.72647	1.63221	3.45337		E6	2.11282	2.31303	1.65719
E7	1.40212	1.48613		E7	1.29349	1.03707	1.14602		E7	1.06416	2.18589	2.23401		E7	1.55797	2.24309	2.03757		E7	1.61221	2.277	2.14528
E8	1.76257	1.6599		E8	1.65345	1.31611	1.77138		E8	1.13762	1.9355	2.51364		E8	1.74599	1.86925	2.61209		E8	1.85882	2.60543	1.64023
E9	1.15122	1.47307							E9	1.1336	1.7827	3.75143							E9	2.0026	2.36997	1.46085
									E10	0.80979	1.27794	1.27048
Mean	1.63623	1.48646		Mean	1.33245	0.938518	1.26541		Mean	1.01231	1.81383	2.20659		Mean	1.37369	1.93707	2.91413		Mean	2.23372	2.39553	2.03302
	AVC	Atrium			AVC	AVC subset	Atrium			Abluminal cells	Cells overlaying AVC	Atrium			Abluminal cells	Cells overlaying AVC	Atrium			Inner layer of leafet/ AVC wall	Outer layer of leaflet	Atrium
Theoretical median	1	1		Theoretical median	1	1	1		Theoretical median	1	1	1		Theoretical median	1	1	1		Theoretical median	1	1	1
Actual median	1.704	1.486		Actual median	1.242	0.9524	1.2		Actual median	1.051	1.808	1.693		Actual median	1.373	1.965	2.605		Actual median	2.003	2.313	2.106
Number of values	9	9		Number of values	8	8	8		Number of values	10	10	10		Number of values	8	8	8		Number of values	9	9	9
Wilcoxon Signed Rank Test				Wilcoxon Signed Rank Test					Wilcoxon Signed Rank Test					Wilcoxon Signed Rank Test					Wilcoxon Signed Rank Test
Sum of signed ranks (W)	45	45		Sum of signed ranks (W)	34	-10	34		Sum of signed ranks (W)	7	55	55		Sum of signed ranks (W)	34	36	36		Sum of signed ranks (W)	45	45	45
Sum of positive ranks	45	45		Sum of positive ranks	35	13	35		Sum of positive ranks	31	55	55		Sum of positive ranks	35	36	36		Sum of positive ranks	45	45	45
Sum of negative ranks	0	0		Sum of negative ranks	-1	-23	-1		Sum of negative ranks	-24	0	0		Sum of negative ranks	-1	0	0		Sum of negative ranks	0	0	0
P value (two tailed)	0.0039	0.0039		P value (two tailed)	0.0156	0.5469	0.0156		P value (two tailed)	0.7695	0.002	0.002		P value (two tailed)	0.0156	0.0078	0.0078		P value (two tailed)	0.0039	0.0039	0.0039
Exact or estimate?	Exact	Exact		Exact or estimate?	Exact	Exact	Exact		Exact or estimate?	Exact	Exact	Exact		Exact or estimate?	Exact	Exact	Exact		Exact or estimate?	Exact	Exact	Exact
P value summary	**	**		P value summary	*	ns	*		P value summary	ns	**	**		P value summary	*	**	**		P value summary	**	**	**
Significant (alpha=0.05)?	Yes	Yes		Significant (alpha=0.05)?	Yes	No	Yes		Significant (alpha=0.05)?	No	Yes	Yes		Significant (alpha=0.05)?	Yes	Yes	Yes		Significant (alpha=0.05)?	Yes	Yes	Yes
How big is the discrepancy?				How big is the discrepancy?					How big is the discrepancy?					How big is the discrepancy?					How big is the discrepancy?
Discrepancy	0.7043	0.4861		Discrepancy	0.2419	-0.04762	0.2002		Discrepancy	0.05143	0.8084	0.6927		Discrepancy	0.3725	0.9651	1.605		Discrepancy	1.003	1.313	1.106
95% confidence interval	0.4021 to 0.7626	0.3164 to 0.6802		95% confidence interval	-0.02575 to 0.7508	-0.4944 to 0.3161	-0.03373 to 0.7714							95% confidence interval	-0.04074 to 0.7460	0.2636 to 1.339	1.038 to 3.587		95% confidence interval	0.6008 to 2.228	0.9309 to 1.605	0.6402 to 1.213
Actual confidence level	96.09	96.09		Actual confidence level	99.22	99.22	99.22							Actual confidence level	99.22	99.22	99.22		Actual confidence level	96.09	96.09	96.09

## Sheet: Fig 5 snail1b RNAscope
	55 and 60 hpf				65 hpf				80 hpf
	dots/micron^2				dots/micron^2				dots/micron^2
Embryo	Luminal	Abluminal		Embryo	Luminal	Abluminal		Embryo	Outer layer	Inner layers	Valve Base
1	0.53221	0.63944		1	0.27614	0.54988		1	0.05953	0.65004	0.09977
2	0.52265	0.35842		2	0.43492	0.55797		2	0.78493	0.77298	0.98062
3	0.06565	0.31117		3	0.48384	0.51319		3	0.20495	0.54696	0.95658
4	0.31146	0.35337		4	0.49911	0.8035		4	0.63776	0.63335	0.67171
5	0.37458	0.47481		5	0.04266	0.14308		5	0.20797	0.21958	-0.04689
6	0.17498	0.15042		6	0.50091	0.54505		6	0.0032	0.25015	0.3329
7	0.33183	0.23415		7	0.65101	0.66638		7	0.22275	0.2431	0.16951
8	0.31763	0.22162		8	0.15782	0.30187		8	0.18508	-0.03316	-0.00258
9	0.41874	0.24946		9	0.16027	0.43471		9	0.01256	0.40101	0.15874
10	0.215	0.16863		10	0.26937	0.41746		10	0.27196	0.00973	0.19427
11	-0.01582	0.12122		11	0.31144	0.15323		11	0.01608	1.58004	0.89223
12	0.13093	0.25841		12	0.23608	0.36404		12	0.00162	0.71297	0.00767
13	0.02762	0.07753		13	0.28084	0.18162		13	0.11082	0.57391	0.60243
14	0.08145	0.15761		14	0.10448	0.23093		14	0.05858	0.16333	0.09797
15	0.39448	0.19395		15	0.20865	0.33397		15	0.18371	0.26135	0.35335
16	0.25772	0.79694						16	-0.09495	0.00267	-0.01822
17	0.08461	0.46398
18	0.30434	0.25096
19	0.25959	0.35236
20	0.13124	0.31075
21	-0.02835	0.21752
22	0.06442	0.16742
23	0.14725	0.26278
24	0.08802	0.2478
25	0.13531	0.26976
26	0.06893	0.16421
27	0.16875	0.10914
Mean	0.206119	0.280883		Mean	0.307836	0.413125		Mean	0.179159	0.436751	0.340629
Table Analyzed	55 and 60 hpf snail1b			Table Analyzed	65 hpf snail1b			RM one-way ANOVA multiple comparisons
								Number of families	1
Column B	Abluminal			Column B	Abluminal			Number of comparisons per family	3
vs.	vs.			vs.	vs.			Alpha	0.05
Column A	Luminal			Column A	Luminal
								Tukey's multiple comparisons test	Mean Diff.	95.00% CI of diff.	Below threshold?	Summary	Adjusted P Value
Unpaired t test				Unpaired t test				Outer layer vs. Inner layers	-0.2576	-0.5444 to 0.02921	No	ns	0.0817	A-B
P value	0.0888			P value	0.1278			Outer layer vs. Valve Base	-0.1615	-0.3650 to 0.04206	No	ns	0.1321	A-C
P value summary	ns			P value summary	ns			Inner layers vs. Valve Base	0.09612	-0.1112 to 0.3034	No	ns	0.4688	B-C
Significantly different (P < 0.05)?	No			Significantly different (P < 0.05)?	No
One- or two-tailed P value?	Two-tailed			One- or two-tailed P value?	Two-tailed			Test details	Mean 1	Mean 2	Mean Diff.	SE of diff.	n1	n2	q	DF
t, df	t=1.734, df=52			t, df	t=1.569, df=28			Outer layer vs. Inner layers	0.1792	0.4368	-0.2576	0.1104	16	16	3.299	15
								Outer layer vs. Valve Base	0.1792	0.3406	-0.1615	0.07836	16	16	2.914	15
How big is the difference?				How big is the difference?				Inner layers vs. Valve Base	0.4368	0.3406	0.09612	0.07981	16	16	1.703	15
Mean of column A	0.2061			Mean of column A	0.3078
Mean of column B	0.2809			Mean of column B	0.4131
Difference between means (B - A) ± SEM	0.07476 ± 0.04310			Difference between means (B - A) ± SEM	0.1053 ± 0.06709
95% confidence interval	-0.01173 to 0.1613			95% confidence interval	-0.03215 to 0.2427
R squared (eta squared)	0.05469			R squared (eta squared)	0.08084
F test to compare variances				F test to compare variances
F, DFn, Dfd	1.066, 26, 26			F, DFn, Dfd	1.289, 14, 14
P value	0.8715			P value	0.6409
P value summary	ns			P value summary	ns
Significantly different (P < 0.05)?	No			Significantly different (P < 0.05)?	No
Data analyzed				Data analyzed
Sample size, column A	27			Sample size, column A	15
Sample size, column B	27			Sample size, column B	15

## Sheet: Fig 5 twist1b RNAscope
	55 and 60 hpf				65 hpf				80 hpf
	dots/micron^2				dots/micron^2				dots/micron^2
Embryo	Luminal	Abluminal		Embryo	Luminal	Abluminal		Embryo	Outer layer	Inner layers	Valve Base
1	0.21263	0.63944		1	0.35022	1.23803		1	0.11418	0.43866	0.49413
2	0.17906	0.35842		2	0.45048	0.87586		2	0.4169	0.58461	0.90692
3	0.22865	0.31117		3	0.26203	1.09534		3	0.23711	0.78687	1.12909
4	0.04069	0.35337		4	0.48531	1.54017		4	0.12989	0.29895	1.19898
5	0.35393	0.47481		5	0.10022	0.50499		5	0.16811	0.51308	1.31417
6	0.12532	0.15042		6	0.16822	0.647		6	0.11943	0.95975	1.14344
7	0.14721	0.23415		7	0.34154	0.9801		7	0.32642	0.30534	0.7458
8	0.21263	0.22162		8	0.14564	0.58279		8	0.22639	0.49744	1.22153
9	0.18676	0.24946		9	0.05245	0.53742		9	-0.12944	0.36823	1.18234
10	0.03643	0.16863		10	0.04168	0.74651		10	0.24262	0.27311	1.14529
11	0.45904	0.12122		11	0.03469	0.28459		11	0.14115	0.36986	0.78974
12	0.25898	0.25841		12	0.18498	0.24453		12	0.11102	0.36566	0.36821
13	0.01856	0.07753		13	0.09709	0.4221		13	0.02589	0.15585	0.39412
14	0.02314	0.15761		14	0.10742	0.19303		14	0.026	0.23985	0.27913
15	0.06669	0.19395		15	0.12041	0.51397		15	0.13338	0.13423	0.63284
16	0.28608	0.79694						16	0.0106643	0.138695	0.547912
17	0.09725	0.46398
18	0.15494	0.25096
19	0.0952	0.35236
20	0.12971	0.31075
21	0.10301	0.21752
22	0.10311	0.16742
23	0.07811	0.26278
24	0.0788	0.2478
25	0.02832	0.26976
26	0.05109	0.16421
27	0.17562	0.10914
Mean	0.145591	0.280883		Mean	0.196159	0.693762		Mean	0.143732	0.401887	0.843353
Table Analyzed	55 and 60 hpf twist1b			Table Analyzed	65 hpf twist1b			RM one-way ANOVA multiple comparisons
								Number of families	1
Column B	Abluminal			Column B	Abluminal			Number of comparisons per family	3
vs.	vs.			vs.	vs.			Alpha	0.05
Column A	Luminal			Column A	Luminal
								Tukey's multiple comparisons test	Mean Diff.	95.00% CI of diff.	Below threshold?	Summary	Adjusted P Value
Unpaired t test				Unpaired t test				Outer layer vs. Inner layers	-0.2582	-0.4026 to -0.1138	Yes	***	0.0009	A-B
P value	0.0006			P value	<0.0001			Outer layer vs. Valve Base	-0.6996	-0.9233 to -0.4759	Yes	****	<0.0001	A-C
P value summary	***			P value summary	****			Inner layers vs. Valve Base	-0.4415	-0.6387 to -0.2442	Yes	****	<0.0001	B-C
Significantly different (P < 0.05)?	Yes			Significantly different (P < 0.05)?	Yes
One- or two-tailed P value?	Two-tailed			One- or two-tailed P value?	Two-tailed			Test details	Mean 1	Mean 2	Mean Diff.	SE of diff.	n1	n2	q	DF
t, df	t=3.643, df=52			t, df	t=4.658, df=28			Outer layer vs. Inner layers	0.1437	0.4019	-0.2582	0.05559	16	16	6.567	15
								Outer layer vs. Valve Base	0.1437	0.8434	-0.6996	0.08612	16	16	11.49	15
How big is the difference?				How big is the difference?				Inner layers vs. Valve Base	0.4019	0.8434	-0.4415	0.07593	16	16	8.222	15
Mean of column A	0.1456			Mean of column A	0.1962
Mean of column B	0.2809			Mean of column B	0.6938
Difference between means (B - A) ± SEM	0.1353 ± 0.03714			Difference between means (B - A) ± SEM	0.4976 ± 0.1068
95% confidence interval	0.06077 to 0.2098			95% confidence interval	0.2788 to 0.7164
R squared (eta squared)	0.2033			R squared (eta squared)	0.4366
F test to compare variances				F test to compare variances
F, DFn, Dfd	2.281, 26, 26			F, DFn, Dfd	6.879, 14, 14
P value	0.04			P value	0.0009
P value summary	*			P value summary	***
Significantly different (P < 0.05)?	Yes			Significantly different (P < 0.05)?	Yes
Data analyzed				Data analyzed
Sample size, column A	27			Sample size, column A	15
Sample size, column B	27			Sample size, column B	15

## Sheet: Fig S9C
		Heartrate (bpm)
	Embryo	Sham	Occluded
	1	171.429	244.898
	2	246.575	150
	3	230.769	206.897
	4	240	209.302
	5	260.87	195.652
	6	240	214.286
	7	236.842	214.286
	8	196.721	243.243
	9	230.769	60
	10	222.222	257.143
	11	240	197.802
	12	214.286	139.535
	13	206.897	129.032
	14	230.769	203.39
	15	246.575	240
	16	222.222	210.526
	17	235.294	190.476
	18	218.182	200
	19	196.721	122.449
	20	162.162	115.385
	21	222.222	166.667
	22	150	142.857
	23	166.667	92.3077
	24	176.471
	25	162.162
	26	162.162
	mean	211.115	180.267
	count	26	23

## Sheet: Fig S9E
		sham		occluded
		split	not split	split	not split
	SD63	8	2	5	3
	SD64	1	3	2	3
	SD65	5	2	0	5
	SD68	3	0	0	4
	SD69	0	2	0	1
	total	17	9	7	16
		sham	occluded			sham	occluded
	split	17	7		split	0.653846	0.304348
	not split	9	16		not split	0.346154	0.695652
	total	26	23		total	1	1
		The Fisher exact test statistic value is 0.0222. The result is significant at p < .05.
		https://www.socscistatistics.com/tests/fisher/default2.aspx

## Sheet: Fig S9G
		Ratio
		Sham split	Sham not split	Bead split	Bead not split
		0.658929	0.597203	0.596804	0.595716
		0.986378	0.716946	0.700206	0.677256
		0.977673	0.40264	0.656502	0.624716
		0.818332	0.356784	0.740916	0.761576
		0.853225	0.548066	0.653025	0.364276
		0.736569	0.521473		0.498512
		0.818982			0.466343
		0.620265			0.449873
		1.11813			0.239207
		0.49807			0.596391
		0.685518			0.391631
					0.190927
					0.634022
					0.376334
					0.777744
					0.32756
	Average	0.797461	0.523852	0.669491	0.498255
	Table Analyzed	Bead injection cdh5			Table Analyzed	Bead injection cdh5			Table Analyzed	Sham vs Bead Cdh5
	Column B	Sham not split			Column D	Bead not split			Column B	Data Set-B
	vs.	vs.			vs.	vs.			vs.	vs.
	Column A	Sham split			Column C	Bead split			Column A	Data Set-A
	Unpaired t test with Welch's correction				Unpaired t test with Welch's correction				Unpaired t test with Welch's correction
	P value	0.0032			P value	0.0031			P value	0.0158
	P value summary	**			P value summary	**			P value summary	*
	Significantly different (P < 0.05)?	Yes			Significantly different (P < 0.05)?	Yes			Significantly different (P < 0.05)?	Yes
	One- or two-tailed P value?	Two-tailed			One- or two-tailed P value?	Two-tailed			One- or two-tailed P value?	Two-tailed
	Welch-corrected t, df	t=3.570, df=13.56			Welch-corrected t, df	t=3.390, df=18.95			Welch-corrected t, df	t=2.553, df=30.84
	How big is the difference?				How big is the difference?				How big is the difference?
	Mean of column A	0.7975			Mean of column C	0.6695			Mean of column A	0.7009
	Mean of column B	0.5239			Mean of column D	0.4983			Mean of column B	0.539
	Difference between means (B - A) ± SEM	-0.2736 ± 0.07665			Difference between means (D - C) ± SEM	-0.1712 ± 0.05052			Difference between means (B - A) ± SEM	-0.1619 ± 0.06339
	95% confidence interval	-0.4385 to -0.1087			95% confidence interval	-0.2770 to -0.06548			95% confidence interval	-0.2912 to -0.03255
	R squared (eta squared)	0.4845			R squared (eta squared)	0.3774			R squared (eta squared)	0.1745
	F test to compare variances				F test to compare variances				F test to compare variances
	F, DFn, Dfd	1.930, 10, 5			F, DFn, Dfd	10.68, 15, 4			F, DFn, Dfd	1.488, 16, 20
	P value	0.4848			P value	0.034			P value	0.3968
	P value summary	ns			P value summary	*			P value summary	ns
	Significantly different (P < 0.05)?	No			Significantly different (P < 0.05)?	Yes			Significantly different (P < 0.05)?	No
	Data analyzed				Data analyzed				Data analyzed
	Sample size, column A	11			Sample size, column C	5			Sample size, column A	17
	Sample size, column B	6			Sample size, column D	16			Sample size, column B	21

## Sheet: Fig S9H,I
	Experiment	Embryo	beats per second	after 10min	after 4hours	Heartrate at imaging	beats per minute	after 10min	after 4 hours	Heartrate at imaging	split	not split		Experiment	Embryo	beats per second	after 10min	after 4hours	Heartrate	beats per minute	after 10min	after 4 hours	Heartrate at imaging	split	not split
	SD75	C1	1.89189	2.5	3.0303	3.1746	113.514	150	181.818	190.476	1			SD75	B1	1.57895	1.69811	1.76471	3.0303	94.7368	101.887	105.882	181.818	1
		C2	1.81818	2.29167	2.22222	2.94118	109.091	137.5	133.333	176.471		1			B2	1.70213	1.525	1.38462	2.38095	102.128	91.5	83.0769	142.857		1
		C3	1.81818	2.25	1.95833	2.85714	109.091	135	117.5	171.429	1				B3	1.66667	1.13208	1.42857	3.1746	100	67.9245	85.7143	190.476	1
		C4	1.40741	1.76471	1.66667	2.77778	84.4444	105.882	100	166.667	1				B4	1.7	1.05263	1.17647	3.0303	102	63.1579	70.5882	181.818	1
		C5	1.66667	2.26923	1.91667	2.22222	100	136.154	115	133.333	1				B5	1.63265	1.2	1.26923	2.38095	97.9592	72	76.1538	142.857		1
	SD71	C1	2.24167	2.35294	2.04082	2.38095	134.5	141.176	122.449	142.857	1				B6	1.6129	1.16279	1.2	2.43902	96.7742	69.7674	72	146.341		1
		C2	2.61806	2.22222	2.05128	3.7037	157.083	133.333	123.077	222.222		1		SD71	B1	2.25	0.730769	2.26415	3.1746	135	43.8462	135.849	190.476		1
		C3	1.93548	1.84615	1.56667	3.22581	116.129	110.769	94	193.548	1				B2	2.22222	0.884615	1.66667	3.33333	133.333	53.0769	100	200		1
	SD79	C1	2.8	2.72727	2.91667	3.7037	168	163.636	175	222.222	1				B3	2.14286	1.21951	1.85185	2	128.571	73.1707	111.111	120		1
		C2	2.58333	2.5	3.5	3.50877	155	150	210	210.526	1			SD79	B2	2.96296	2.19231	2	3.33333	177.778	131.538	120	200		1
		C3	2.8125	2.43243	3	4	168.75	145.946	180	240	1				B3	2.81818	2	2.2	3.38983	169.091	120	132	203.39		1
		C4	2.72727	2.5	2.6	3.92157	163.636	150	156	235.294	1				B4	2.82051	2	2.26316	3.33333	155	120	135.789	200		1
		C6	2.66667	2.6087	2.53125	4.16667	160	156.522	151.875	250	1				B5	2.63333	1.35	2	3.63636	168.75	81	120	218.182		1
	SD81	C1	2.7	2.58065	3.34615	4.47761	162	154.839	200.769	268.657		1			B6	2.7027	2.16667	1.90476	3.27869	169.231	130	114.286	196.721		1
		C2	2.22222	2.5	3.5	4.05405	133.333	150	210	243.243	1			SD81	B1	3.04348	2.09677	2.5	4.25532	182.609	125.806	150	255.319		1
		C4	2.63333	2.46667	3.04348	4.34783	158	148	182.609	260.87	1				B2	2.93333	2.14815	2.61549	4.16667	176	128.889	156.929	250	1
		C5	2.63158	2.42424	3.07692	4.34783	157.895	145.455	184.615	260.87		1			B3	2.6	2.29167	2.52381	4.25532	156	137.5	151.429	255.319	1
		C6	2.46667	3.2	2.58065	4	148	192	154.839	240		1			B4	2.42857	2.05882	1.76471	4.25532	145.714	123.529	105.882	255.319		1
															B5	2.66667	2.13636	1.89655	3.63636	160	128.182	113.793	218.182		1
		average	2.31339	2.41316	2.586	3.54508	138.804	144.79	155.16	212.705	13	5			average	2.32201	1.63401	1.87762	3.28866	139.509	98.0408	112.657	197.32	5	14
										ratio	0.722222	0.277778											ratio	0.263158	0.736842
										count	18												count	19
		The Fisher exact test statistic value is 0.0086. The result is significant at p < .01
		compare heartrate
		ratio	before treatment	after 10min	after 4 hours	at imaging
		BDM	1.00508	0.677126	0.726069	0.92767
		abs value	before treatment	after 10min	after 4 hours	at imaging			before treatment	after 10min	after 4 hours	at imaging
		Control	2.31339	2.41316	2.586	3.54508		Control	138.804	144.79	155.16	212.705
		BDM	2.32201	1.63401	1.87762	3.28866		BDM	139.32	98.0408	112.657	197.32
								SD Control	26.7843	18.7591	37.4472	41.6257
								SD BDM	31.9183	31.1557	26.9023	40.0555
		ttest for heartrate	before treatment	after 10 min	after 4 hours	at imaging
		BDM	0.942521	3.62868e-06	0.000329299	0.259691
			split (n)	not split (n)
		Control	13	5
		BDM	5	14

[truncated: 20 more sheets: Fig 6B,C,D,G, Fig S10B, Fig S11B,E,F, Fig S12B, Fig 8A , Fig 8C, Fig 8D, Fig 8E, Fig S14C,D, Fig S15B,C, Fig S15F,G,H,K, Fig S16D,E, Fig S16F, Fig 9E,F,G,H,I, Fig S17C,E, Fig S17F, Fig 11B,C, Fig 11E,F, Fig 12C, Fig 12D,E]
